# Supplementary material
Source: Oxford University Press journal article supplement (https://arvo.silverchair-cdn.com/arvo/content_public/journal/iovs/932950/supplementary_figures7_for_on_iovs.pdf)
Supplement: Supplementary file 1 [file supplementary_figures7_for_on_iovs.pdf]

**3 months later**

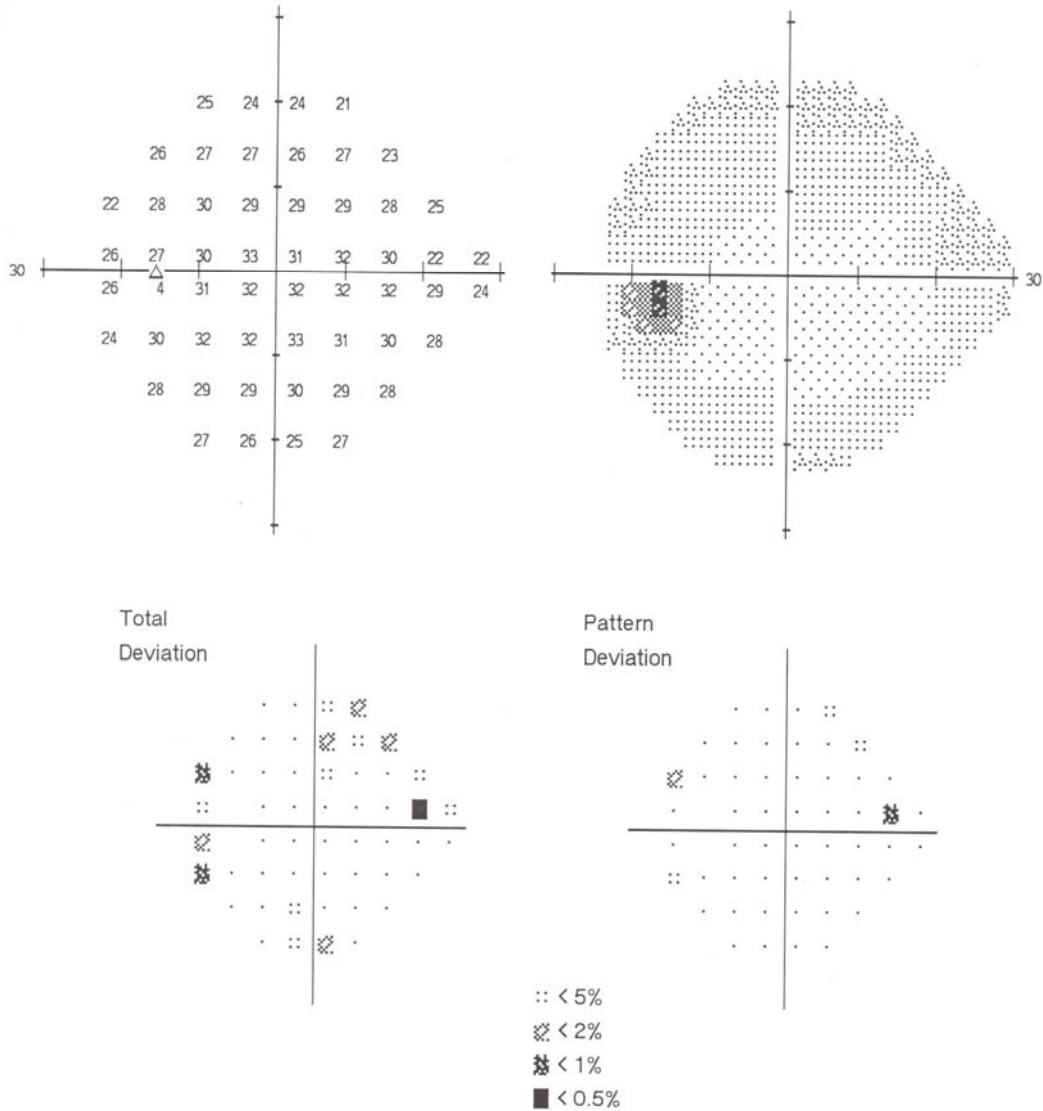

**Supplementary Figure S7.** The HVF results from 3 months after the initial testing for patient MS1. SITA standard central 24-2 threshold test was used. The mean deviation(MD) was improved to -2.60 dB (within normal limits) 3 months later.
